# Supplementary material for: Themis controls T cell activation, effector functions, and metabolism of peripheral CD8+ T cells
Source: PubMed Central journal article supplement (PMC10517225; doi:10.26508/lsa.202302156), 2023-09-22

p-SHP1

115

80

70

50

40

30

25

15

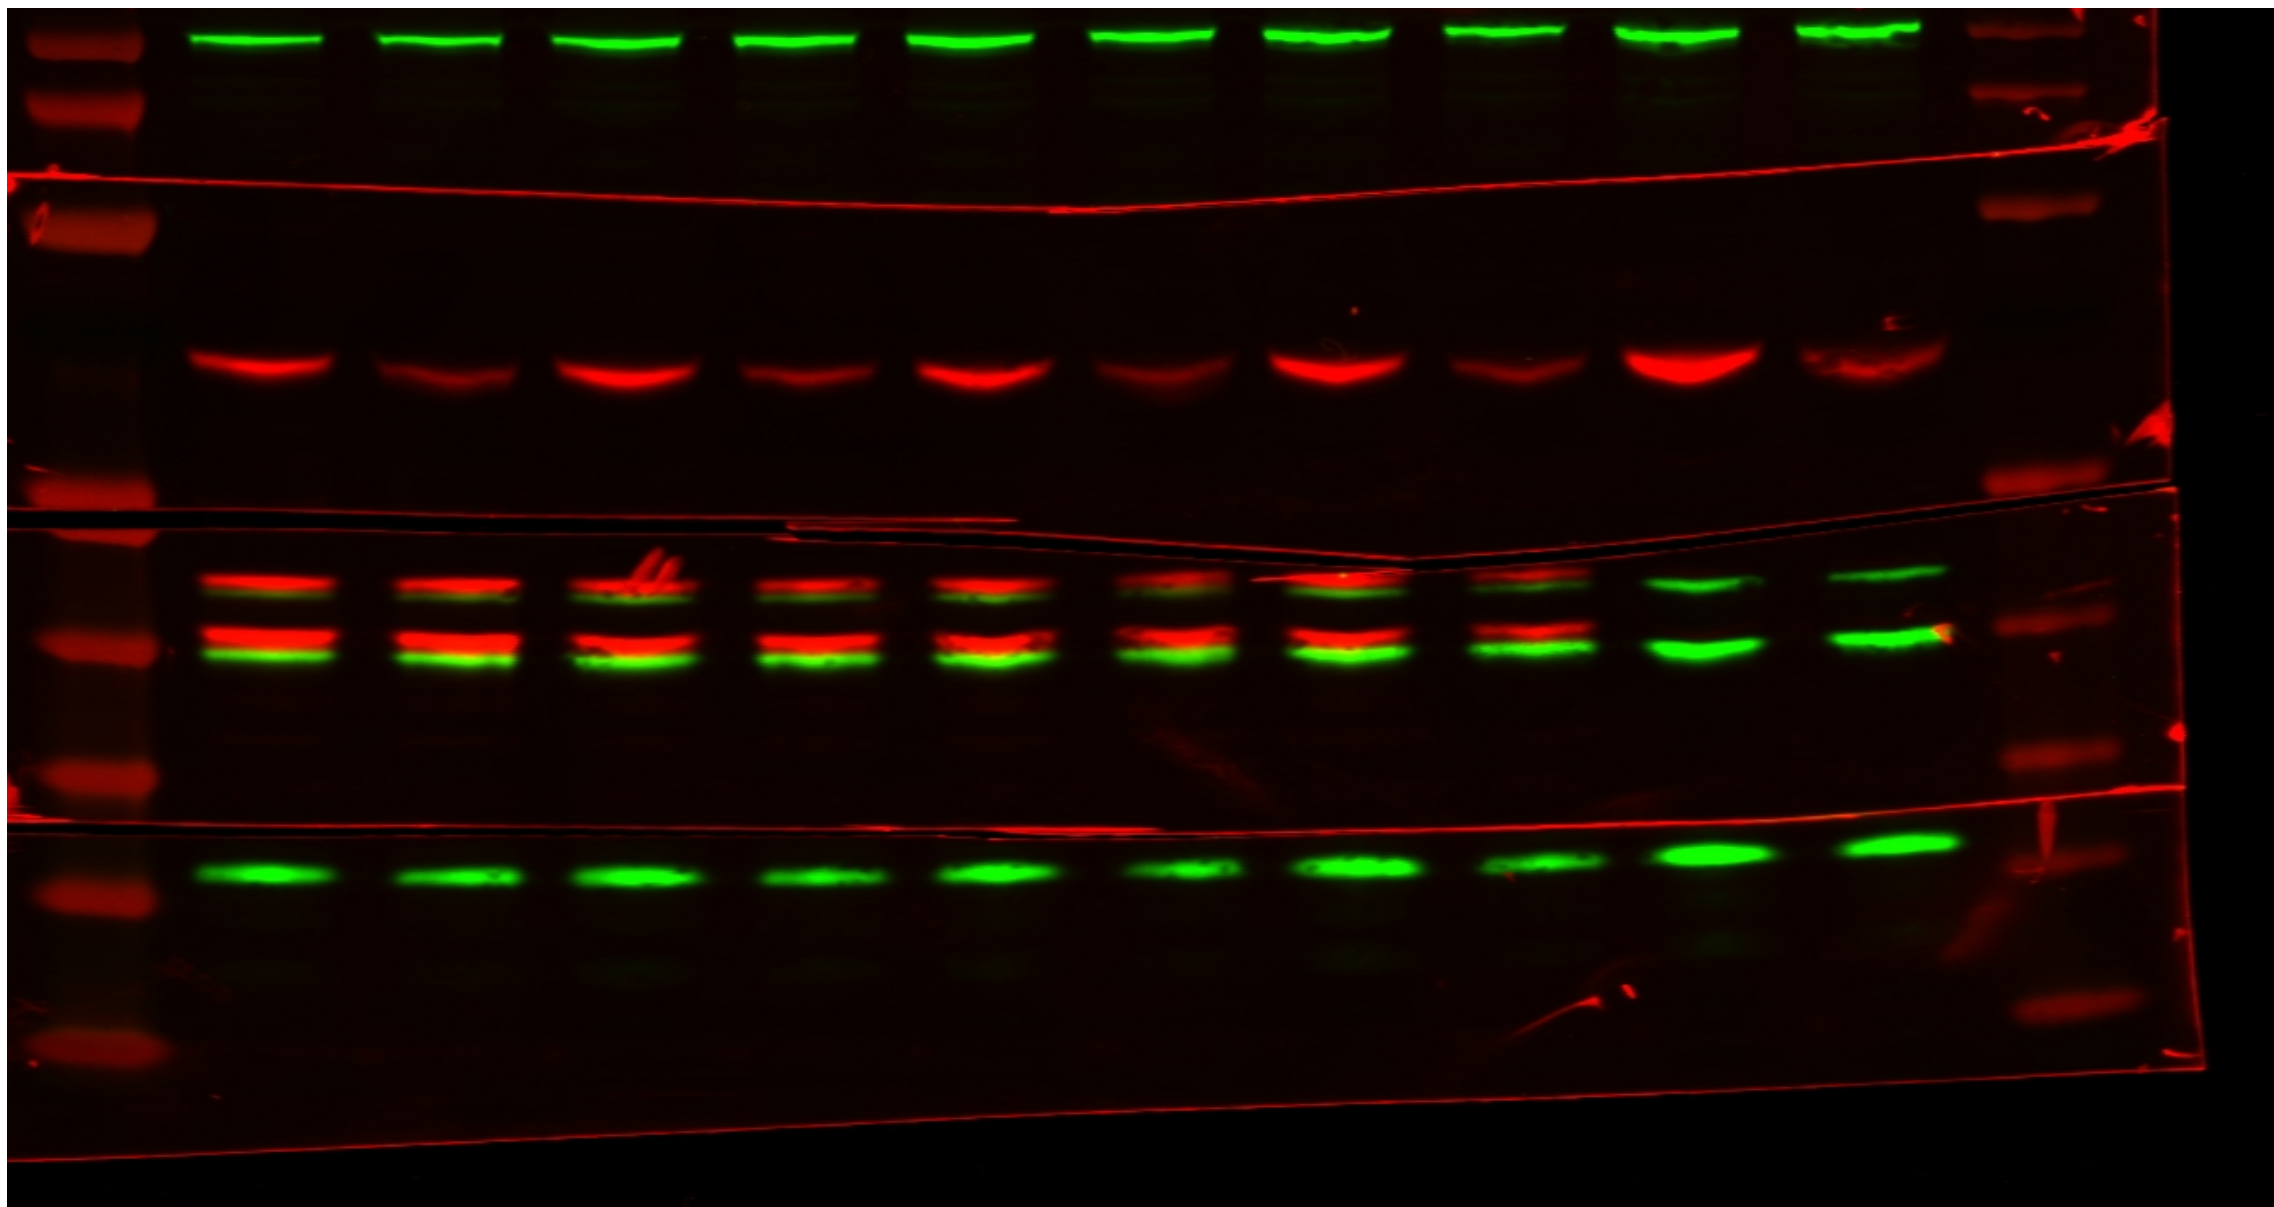

**Total SHP1**

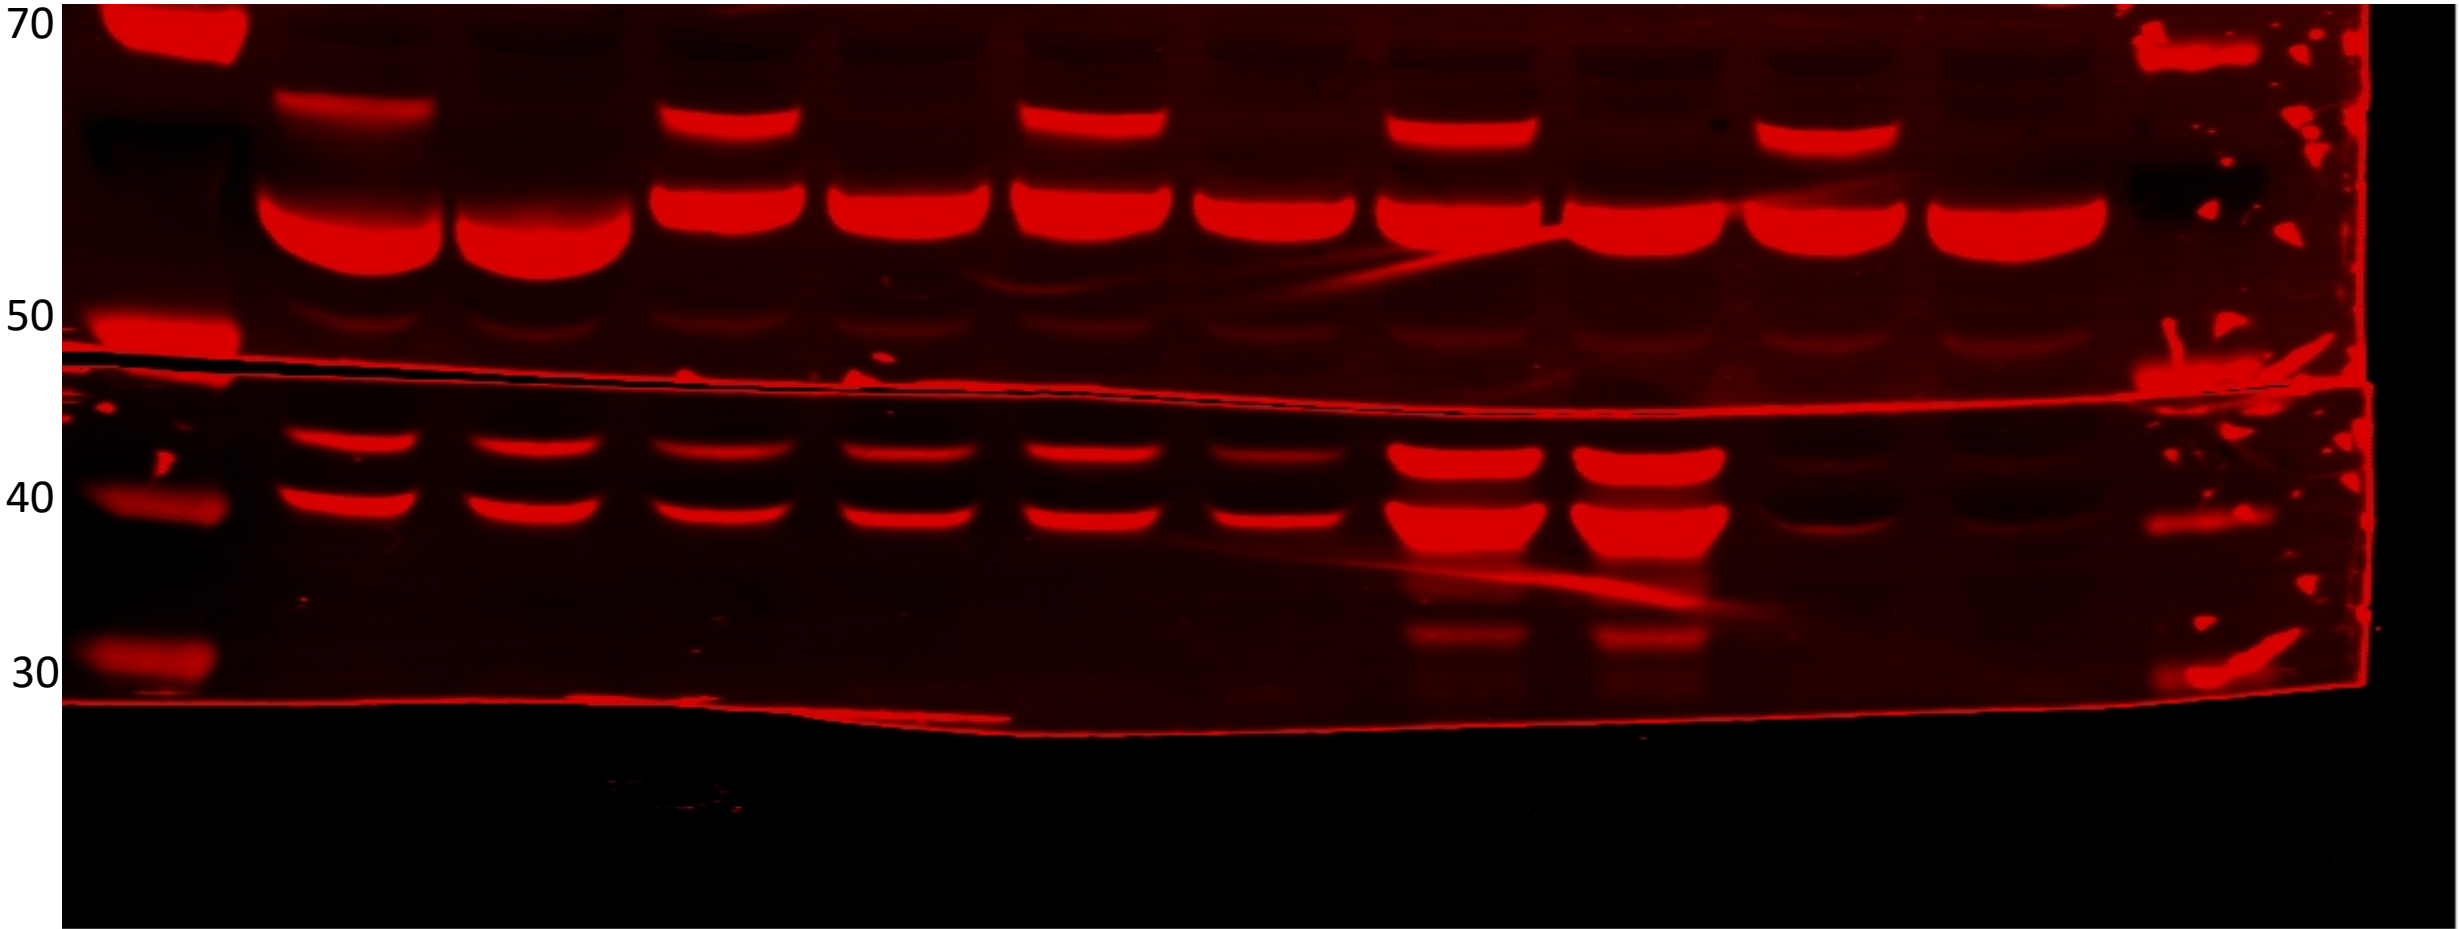

p-ERK

115

80

70

50

40

30

25

15

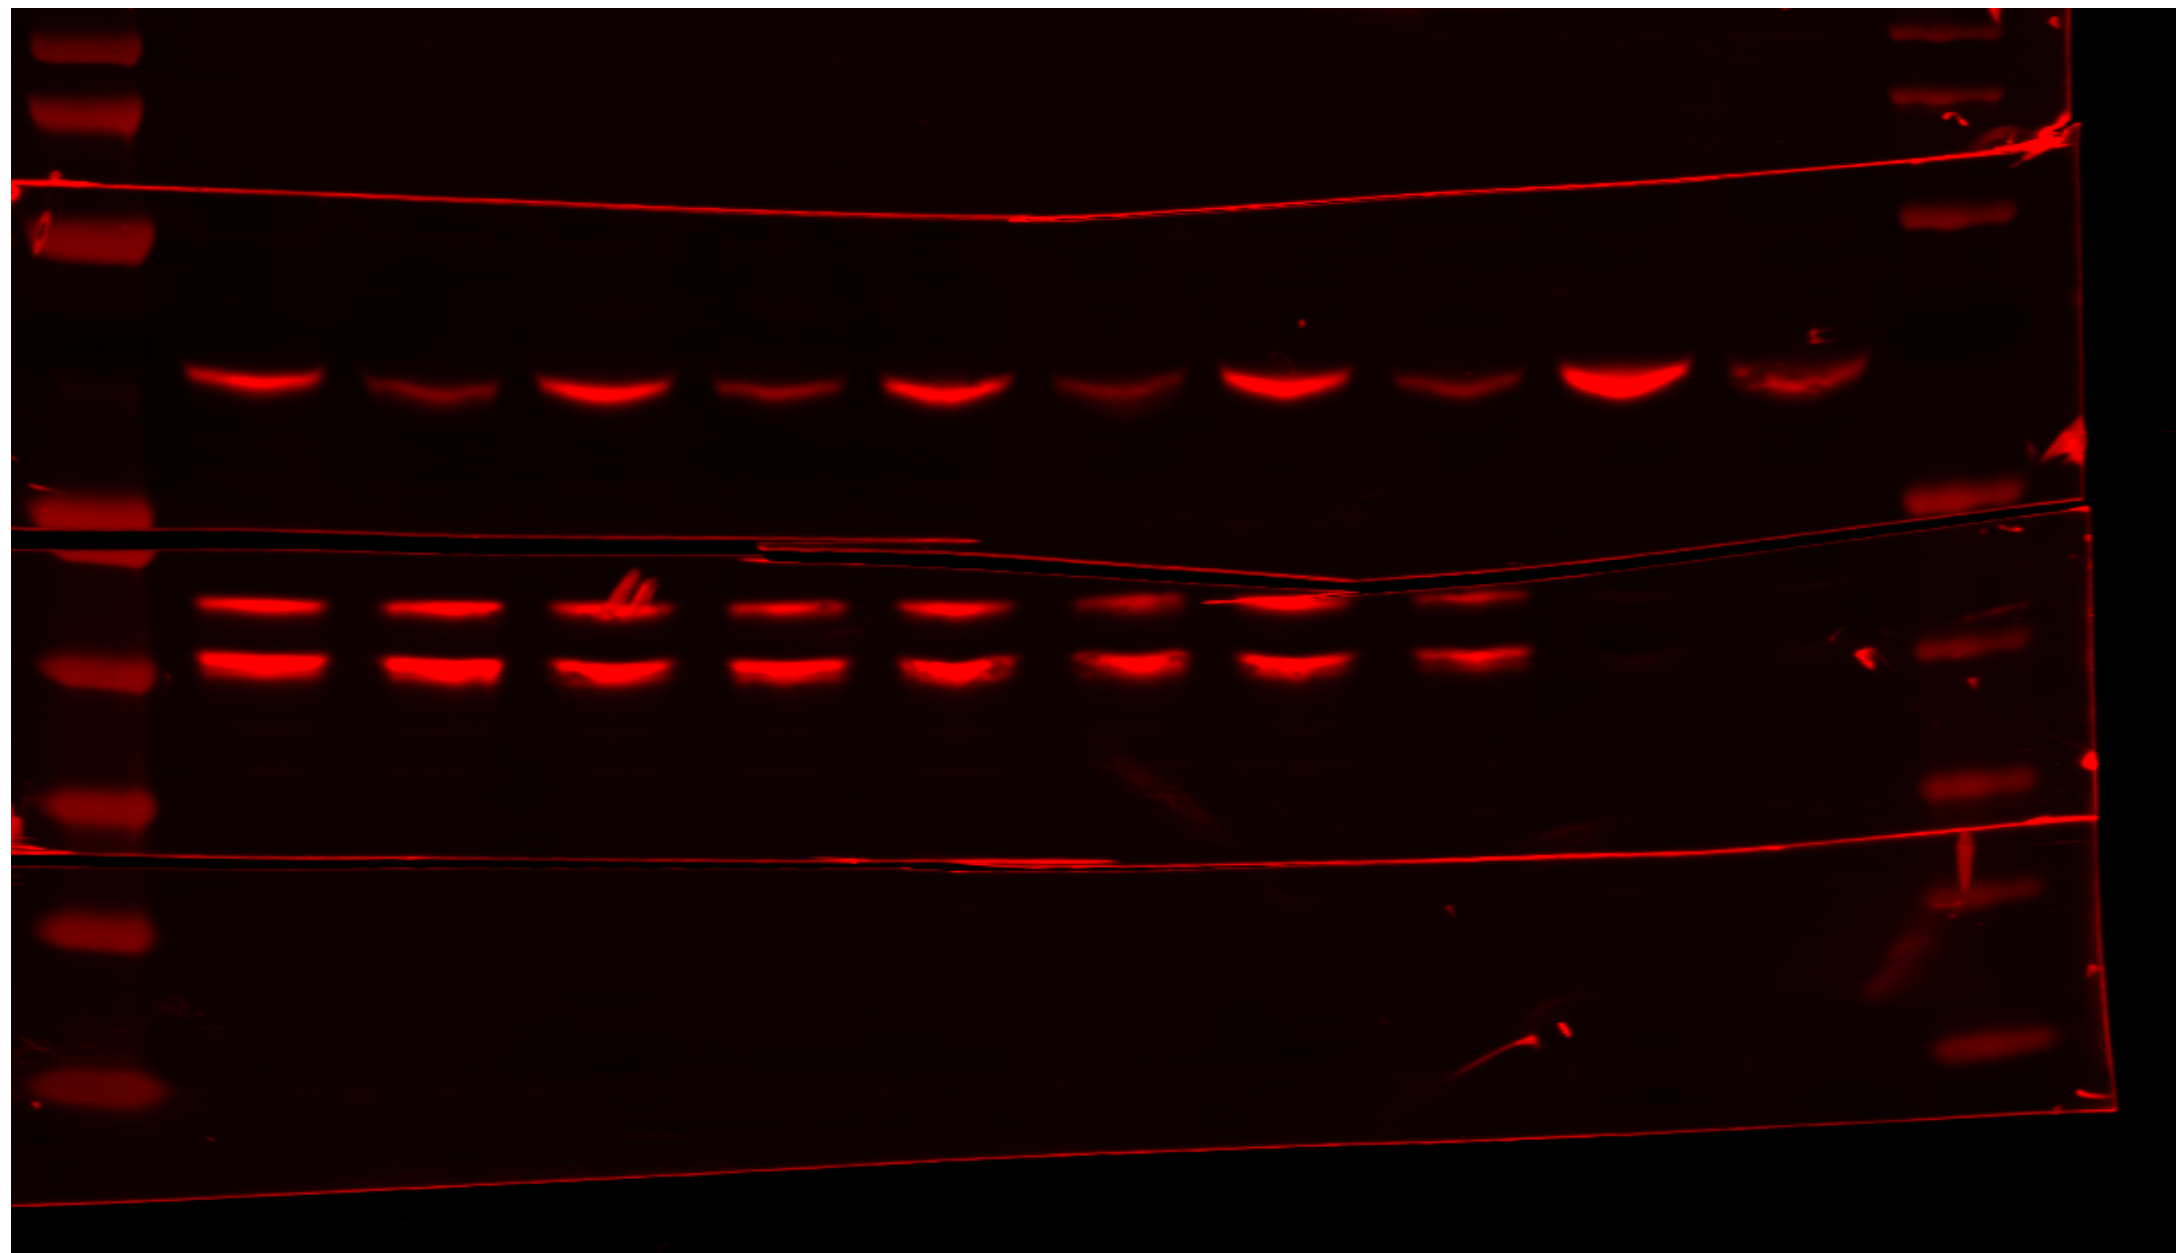

# ERK1/2

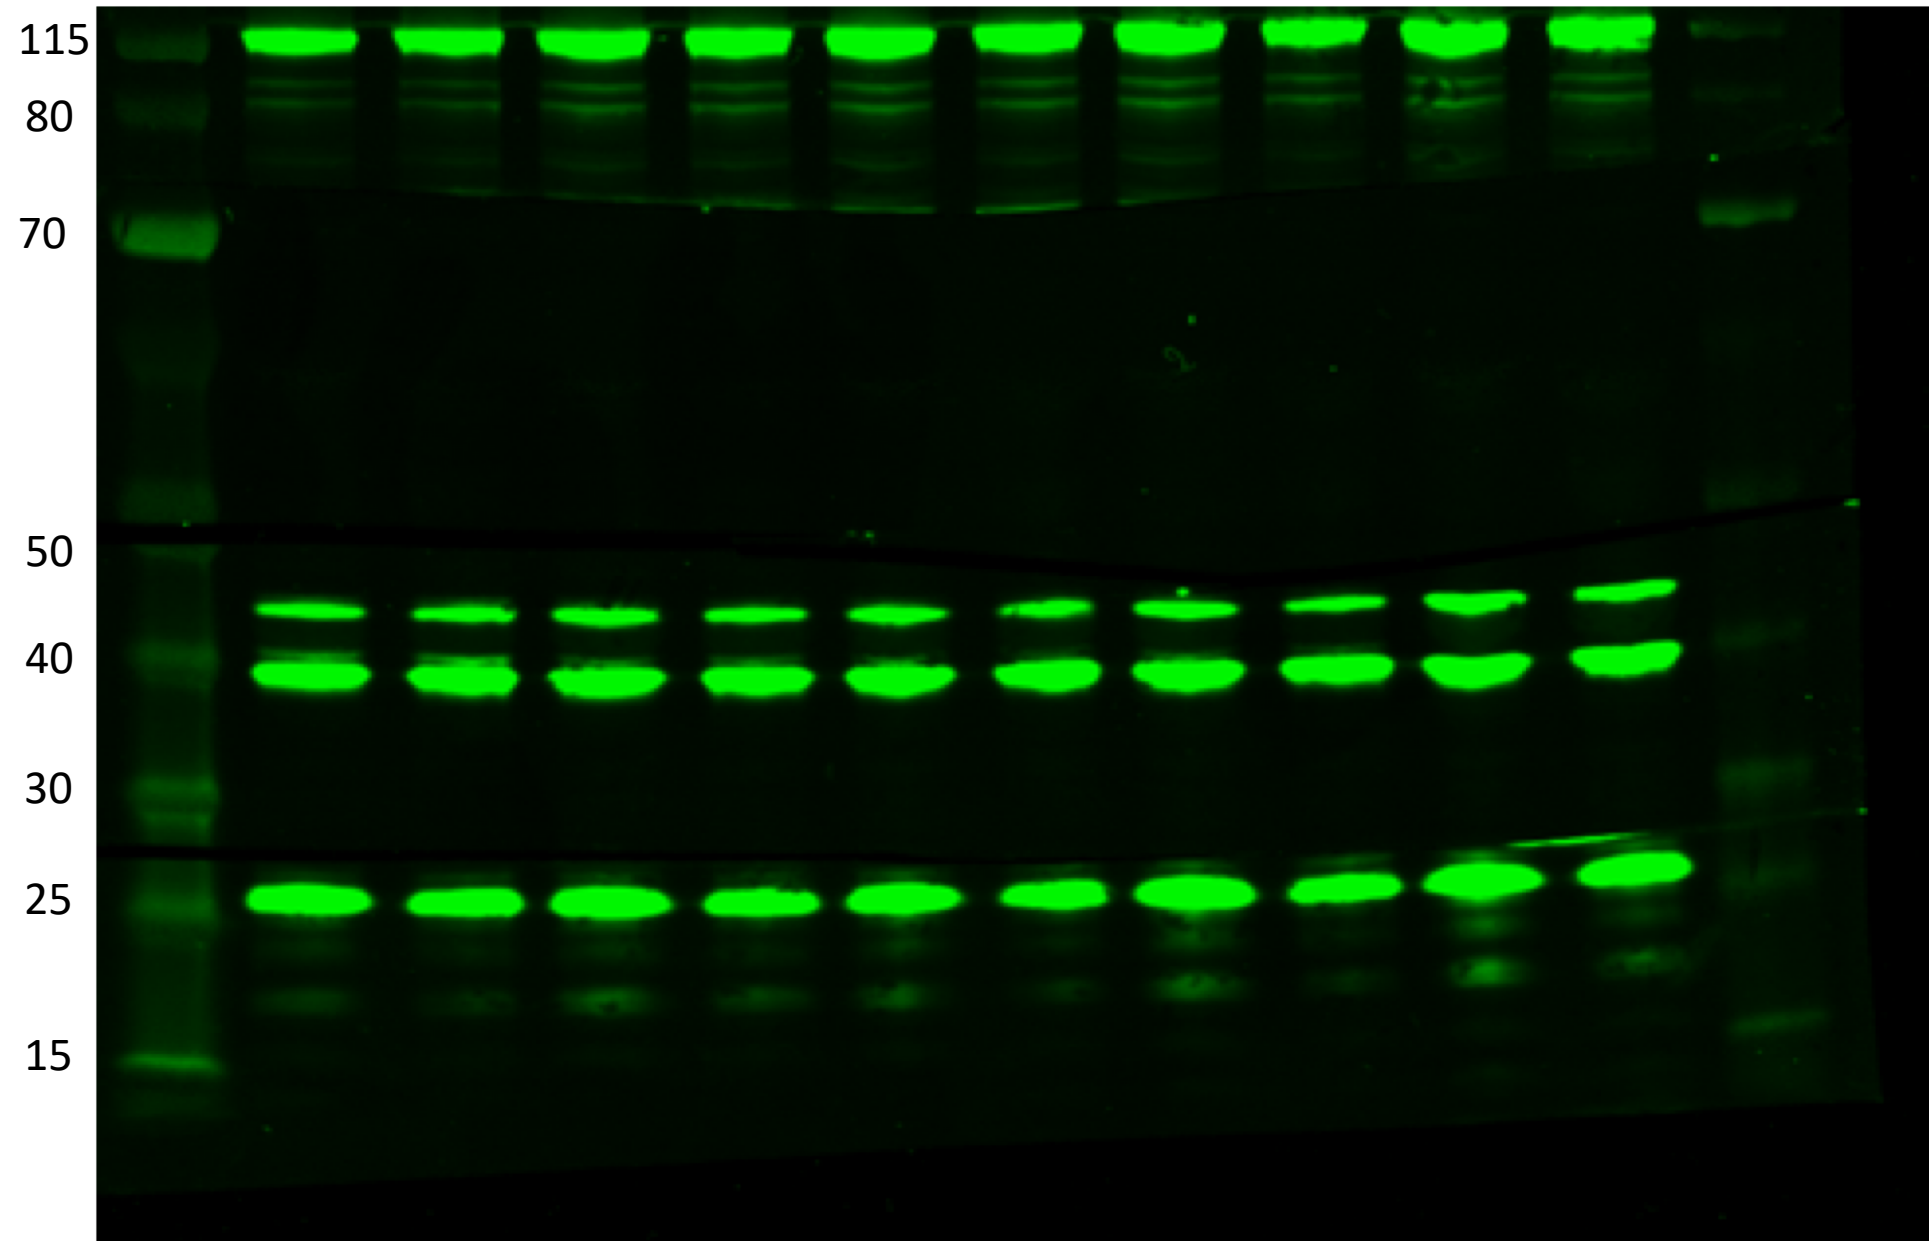

Supplement: LSA-2023-02156_SdataF2.pdf [file LSA-2023-02156_SdataF2.pdf]
